# Supplementary material
Source: PubMed Central journal article supplement (PMC208790)

A

Murine *bcsc-1*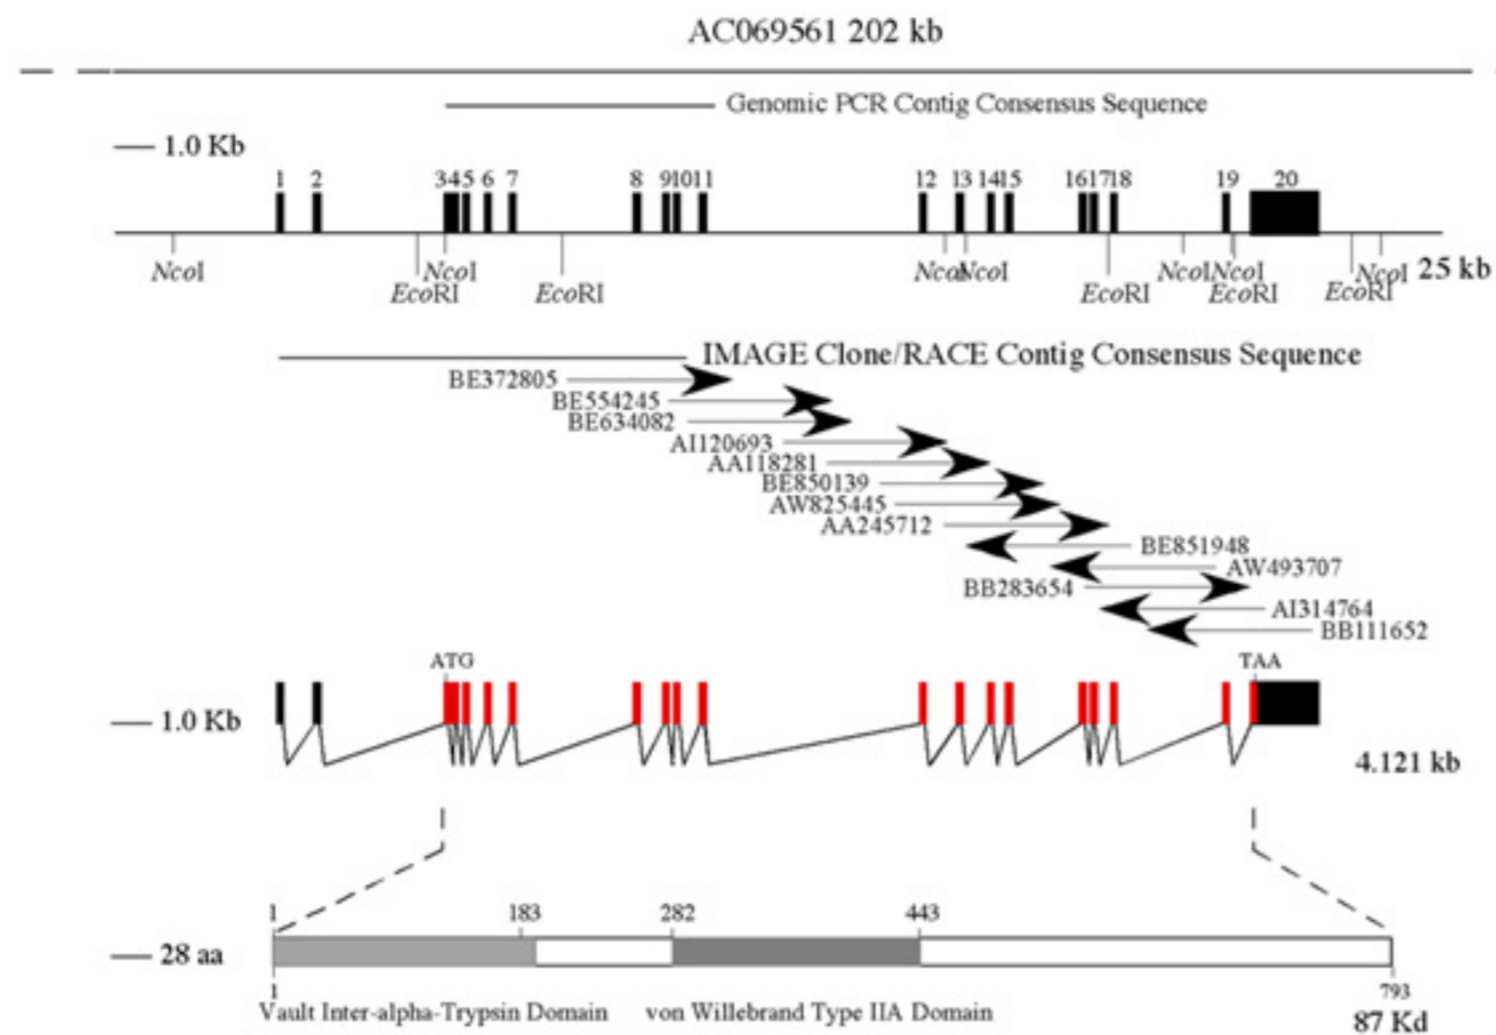

```

1 MEHHCGIITISNKETVPLKNI SVTLLSINEFVAAVVATLNYENEKVPLEATFVFPMDSDSA mBCSC
1 MVHFCGLLTIHRBEVPLKSI SVSVNIIEFVAGVSATLNYENEKVPLEAFVFPMDSDSA hBCSC

61 VYSFEALVDGKKI VAELODKMKAHSEYEALSOGHQAYLLEEDDYSRDVFSCNVGNLQPG mBCSC
61 VYSFEALVDGKKI VAELODKMKARTNYEKIISOGHQAFLLLEGDSSSRDVFSCNVGNLQPG hBCSC

121 ARVAVTIRYVQBLPLETDGALRYLPAI LNPRYQLSEQSANSCLNIKPTVHLEDLPYII mBCSC
121 SKAAVTLKYVQBLPLEADGALRFVLPV LNPRYQFSGSSKDSCLNVKTPIVFVEDLPYII hBCSC

181 NMTATITSQHGI ERVQSNCSLSPITQYLTDKTSAQVSIIEGHKFD RDVELLIYYNEVHSE mBCSC
181 SMVATIDSQHGI ERVQSNCSLSPITEYLGEKTSAQVSLAAGHKFD RDVELLIYYNEVHTE hBCSC

241 SVAVEMGMLDMKHDSL MGAPSAMVSFYPDIPVEEASKACGEFVFLMDRSGSMDS PMSTEN mBCSC
241 SVVLEMGMFPMKPGHLMGDP SAMVSFYHNIPEDQPSNITCGEHTFLMDRSGSMQSPMSSQL hBCSC

301 NSQLRIEAAKETLL LLLKSLRMGCYFN IYGFSSYEKFFPESVKYTQDTMEDAVKRVKAI mBCSC
301 TSQLRIQAAKETI LLLKSLPIGCYFN IYGFSSYEACFPESVKYTCQIMTEALGRVKLM hBCSC

361 KANLGGTEIITP LQNIYKASSIPGHPLQLFVFTDGEVSDTF SVIREVKLNSKKHRCFSFG mBCSC
361 QADLGGTEILAPLQNIYRGPSIPGHPLQLFVFTDGEVITDTFSVIKEVRINRQKHRCFSFG hBCSC

421 IGGASTSLIKNIARVSGGTAVFITGKDRMQIKALGSLKFA LQCAVINISLSWDLPPGLS mBCSC
421 IGGTSTSLIKGIARASGGTSEFITGKDRMQSKAIRTLKRS LQPVVEDVSLSWHLPPGLS hBCSC

481 VKMLSPBQLTIFRGQRLIIYAQLTGLMHOVESTGAVCLKHILQGRSLENRVTFSLQPKAN mBCSC
481 AKMLSPBQLTIFRGQRLISYAQLTGRMPAAEITGEVCLKYTLQGRTFEDKVTFLQPKPI hBCSC

541 DNFTIHLAAKSIIQTKDFGSOEASKEEKEDVMNISTIQSGVLS SFTAFIANKELNKPVC mBCSC
541 VNLT IHLAAKSLLQTKDMGIRFETPASDKKDALNLSLESGVITSSFTAFIANKELNKPVC hBCSC

601 GPLAHRVIFRPVMAGSSS---MRFYSSFSGGFKGPOPRSLRVPAYDI-CSAESANLVIKRI mBCSC
601 GPLAHRVIFRPVHILDGASAPLKIKQSGFRKALHSRDFPSASQPRGELMCKYKAKTFQMDIY hBCSC

657 SAQSATQKKKTNSS TNKSNLKKEHKAFFGENAVVQLISLQKANGSWELDEDITKILGTKSK mBCSC
661 SLCGLI SHKQHSF-----GFGENHIVQLIYHQNANGSWDINEDLAKILGMSLE hBCSC

717 DIKAANPAKHEDPSANSTVLAVVWLHANGTDLKCEWELLERKAVAWLHDHAGSSIEMLVQ mBCSC
710 EIMAHQPAELVDSSGWATILAVIWLHNSNGKDLKCEWELLERKAVAWMRAHAGSTMP SVVK hBCSC

777 AANSLKLSVNPVFGV mBCSC
770 AATFLKSSVDPATFAF hBCSC

```

B

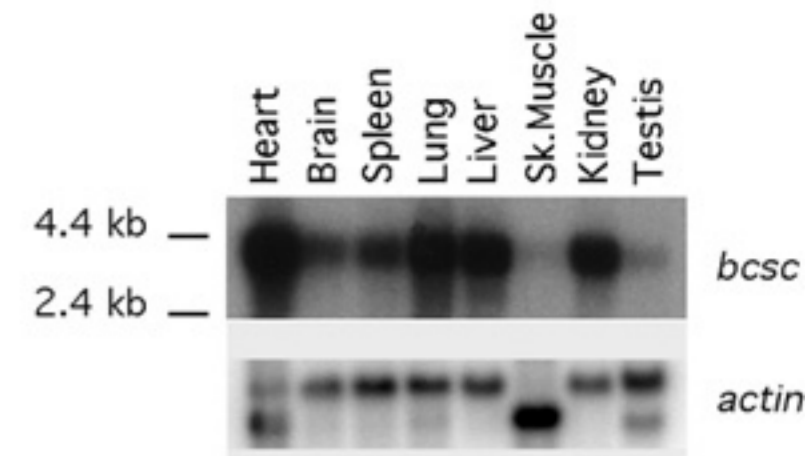

Supplement: pnas_100_20_11517__11.pdf [file pnas_100_20_11517__11.pdf]
