# Supplementary material
Source: PubMed Central journal article supplement (PMC208790)

A

24 Hours Post-Infection

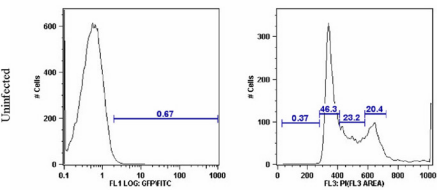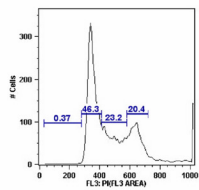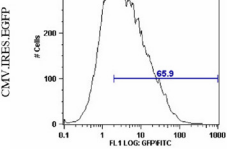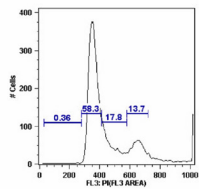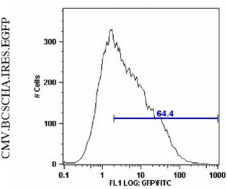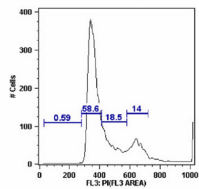

GFP Positive

Propidium Iodide

48 Hours Post-Infection

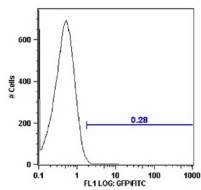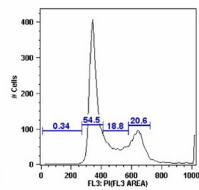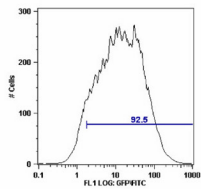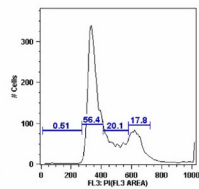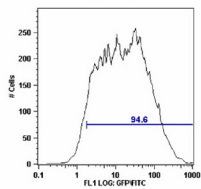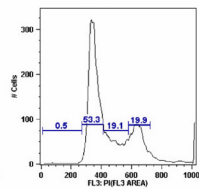

GFP Positive

Propidium Iodide

B

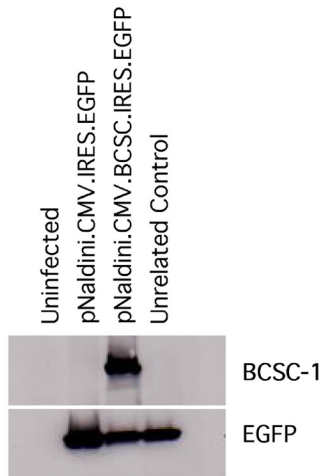

Supplement: pnas_100_20_11517__15.pdf [file pnas_100_20_11517__15.pdf]
