# Supplementary material
Source: PubMed Central journal article supplement (PMC208790)

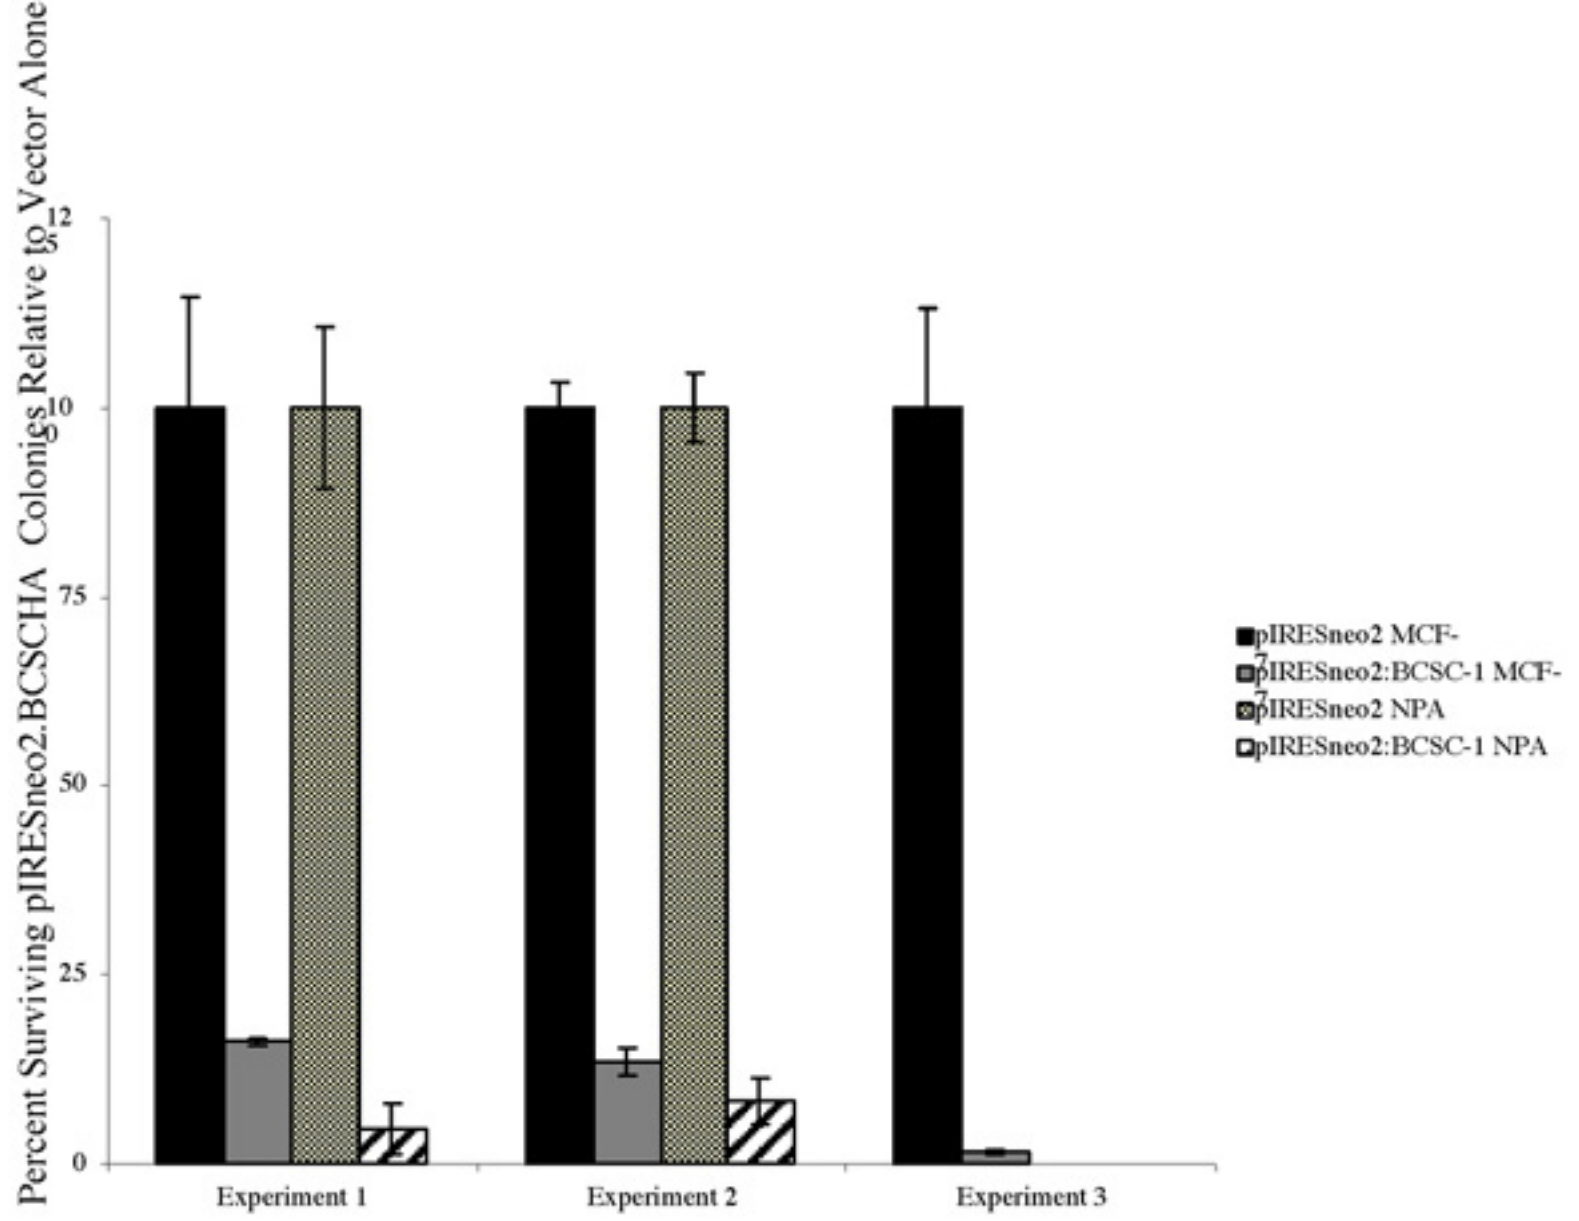

MCF-7

NPA

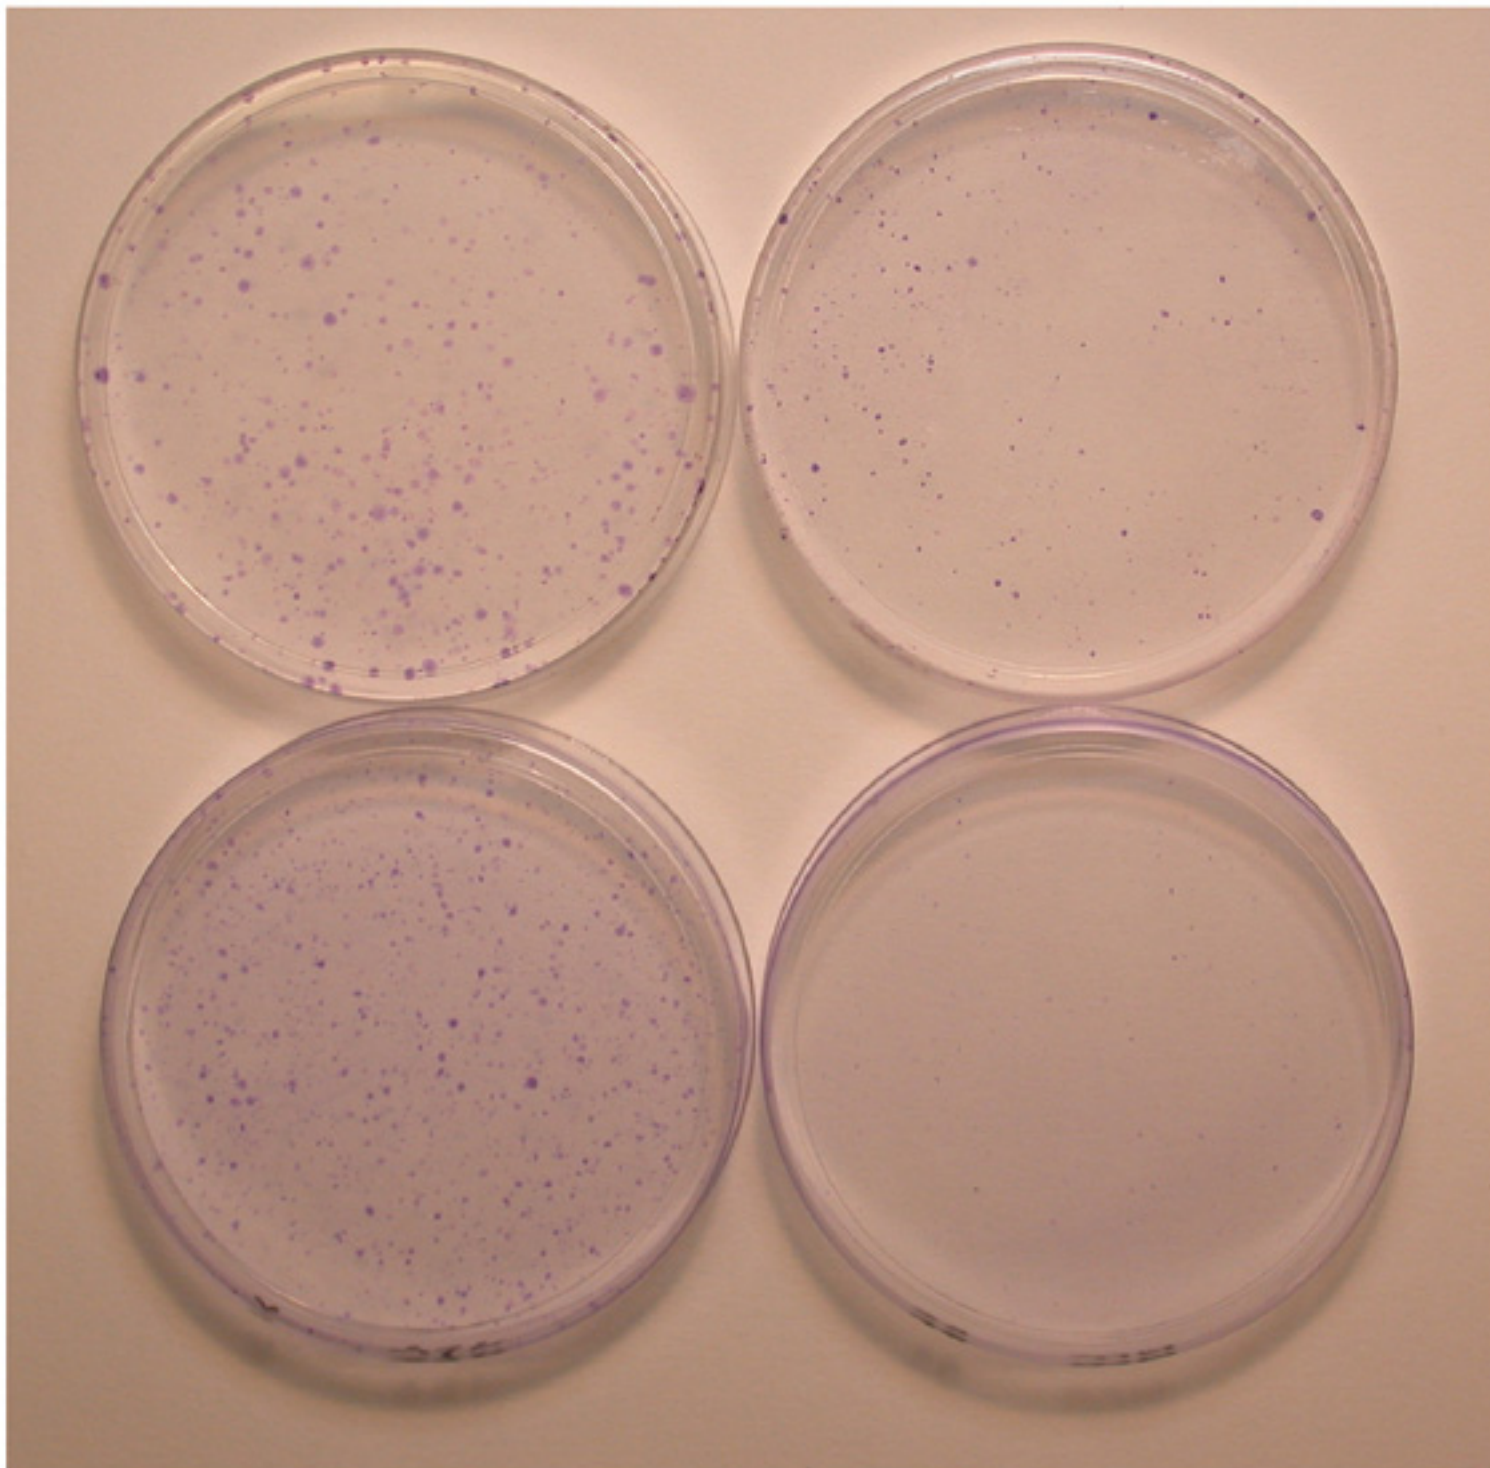

pIRESneo2

BCSC-1

Supplement: pnas_100_20_11517__13.pdf [file pnas_100_20_11517__13.pdf]

# A549

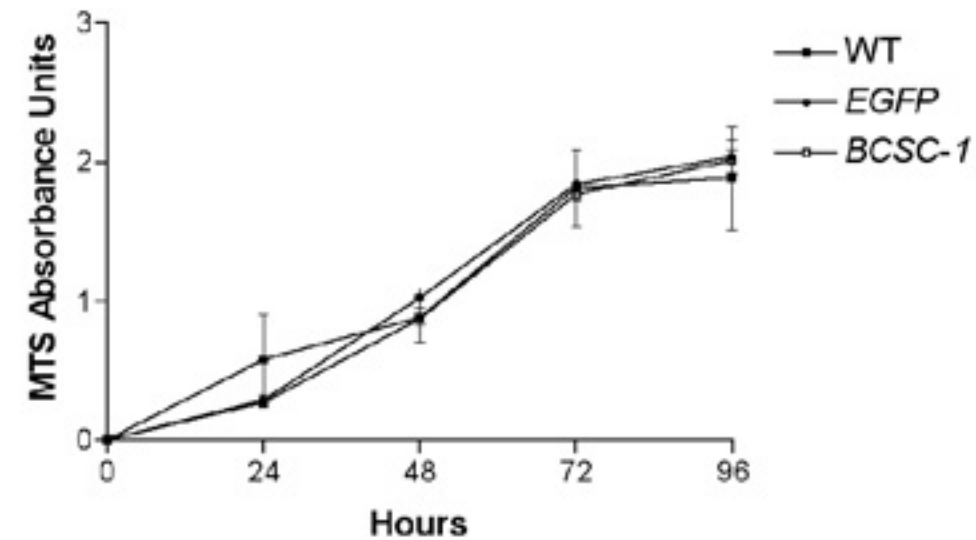

# H460

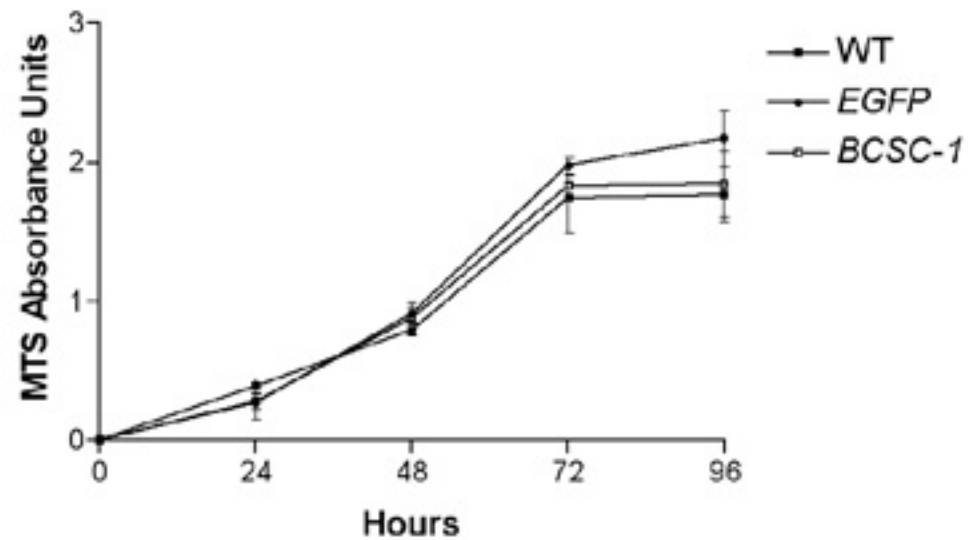

# ES-2

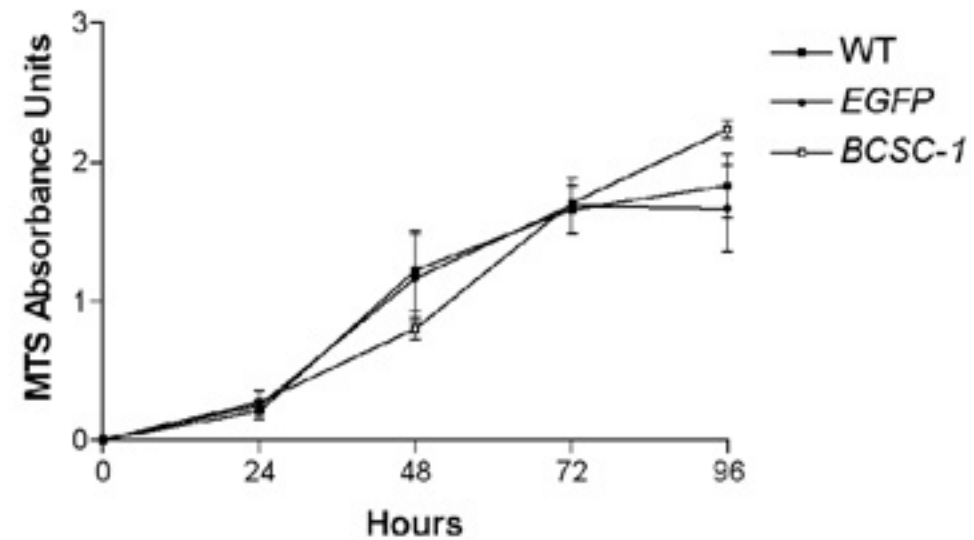

Supplement: pnas_100_20_11517__17.pdf [file pnas_100_20_11517__17.pdf]

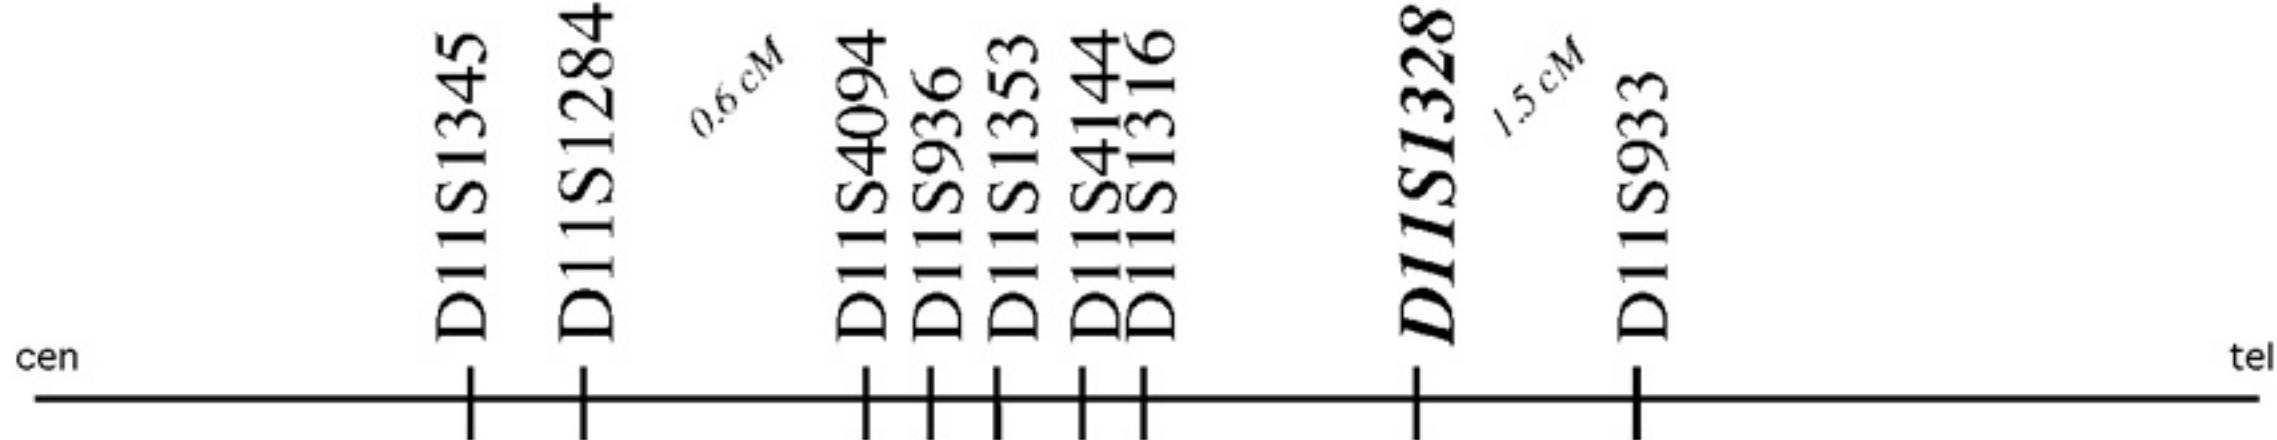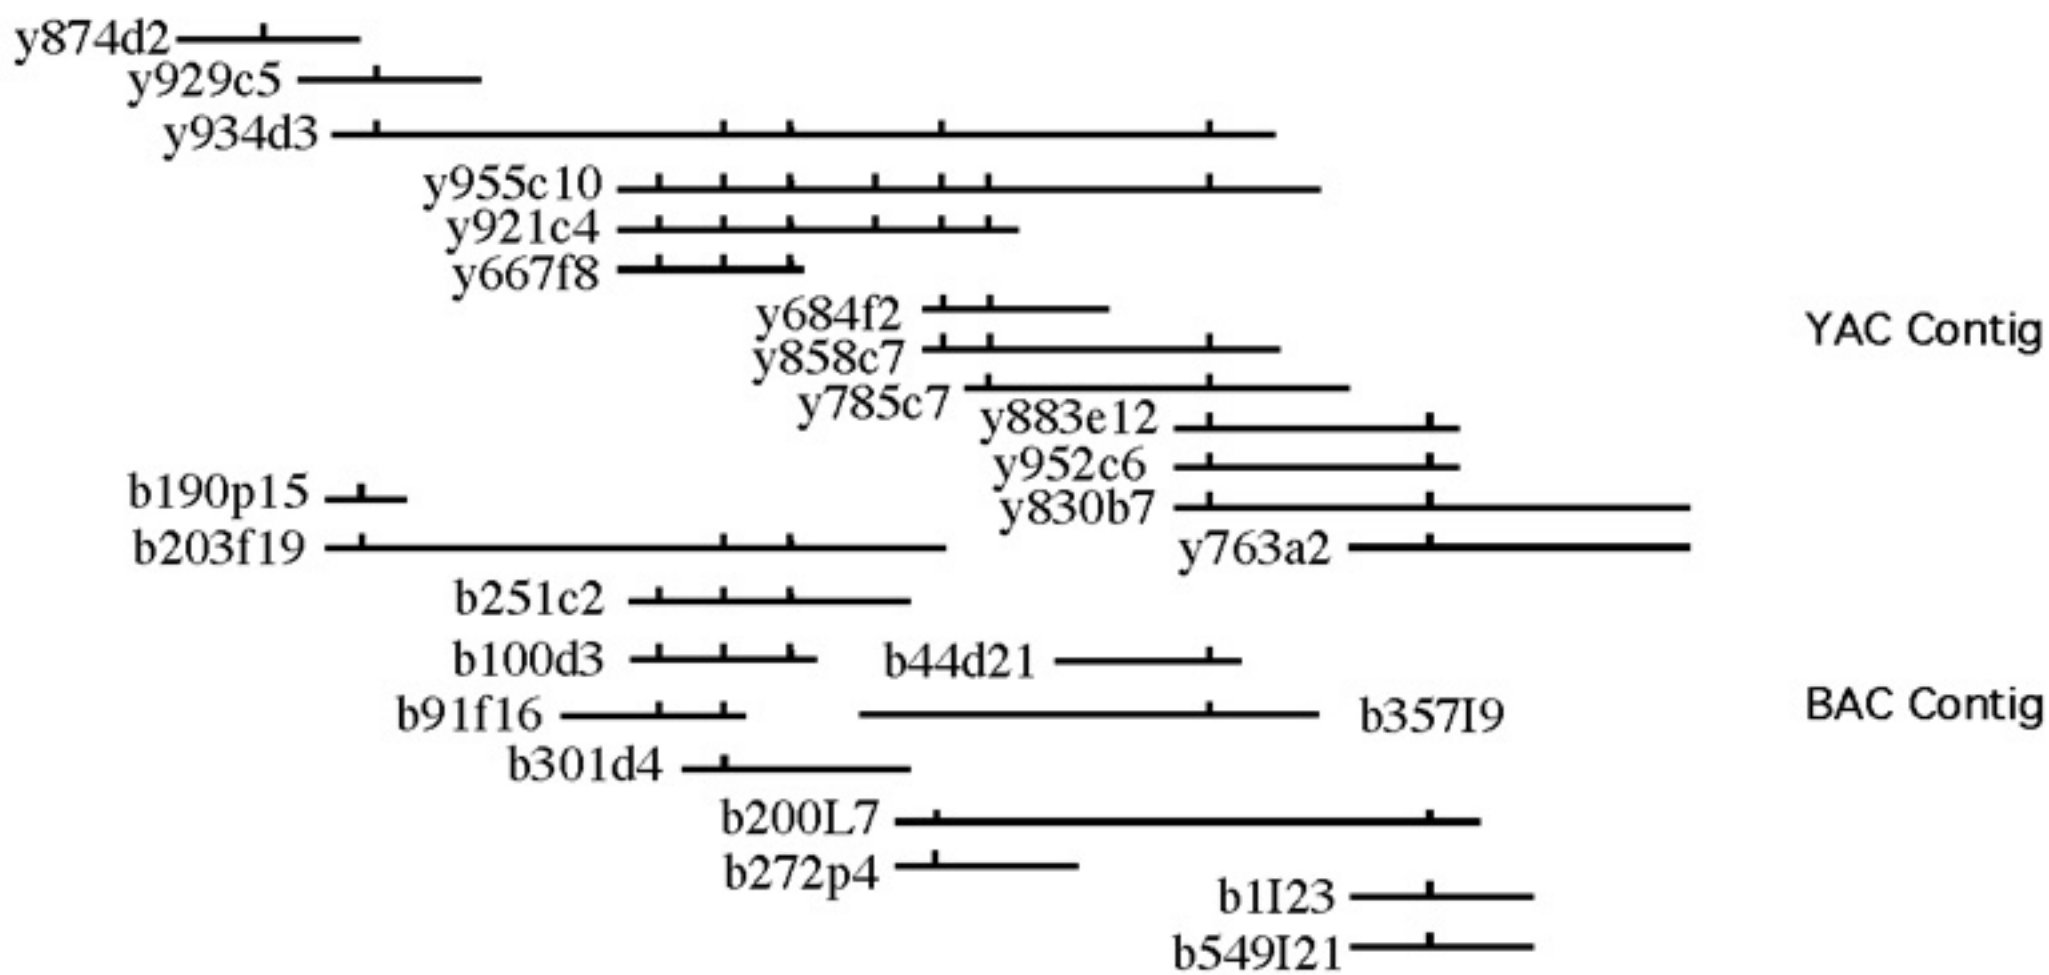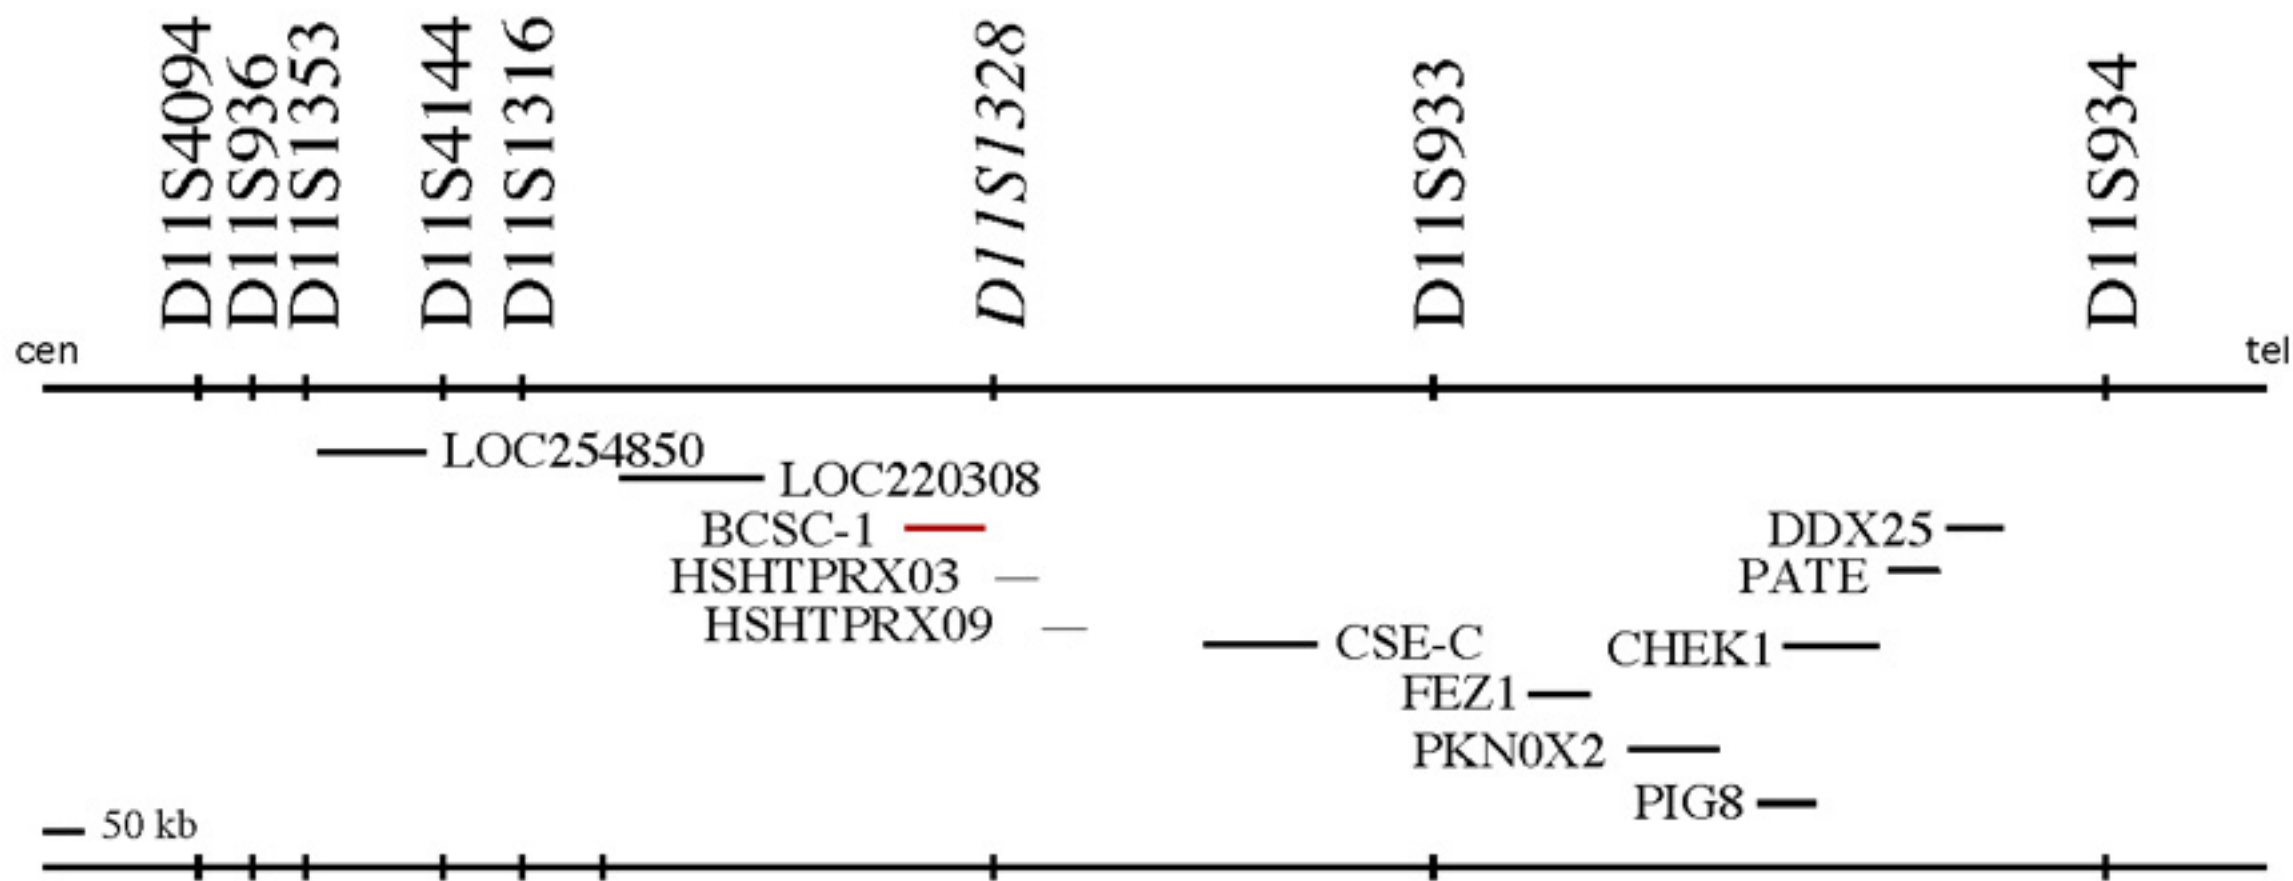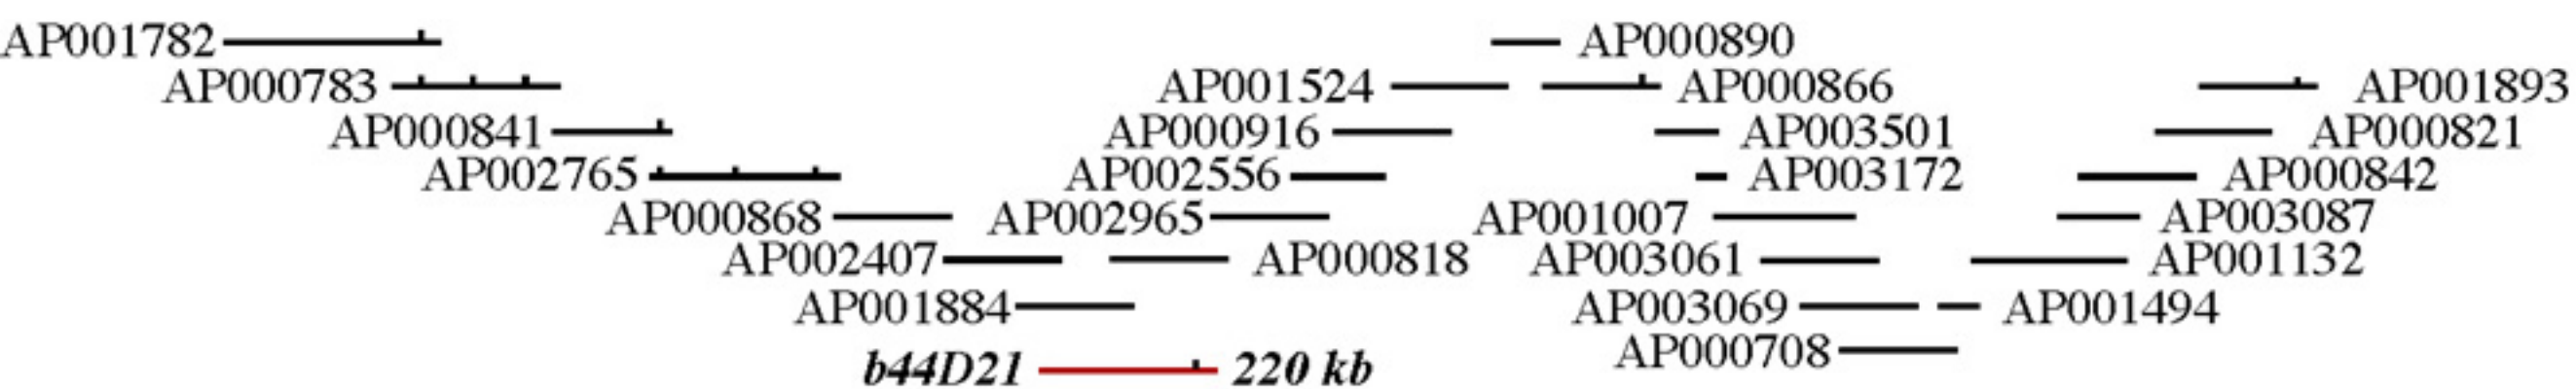

Supplement: pnas_100_20_11517__2.pdf [file pnas_100_20_11517__2.pdf]

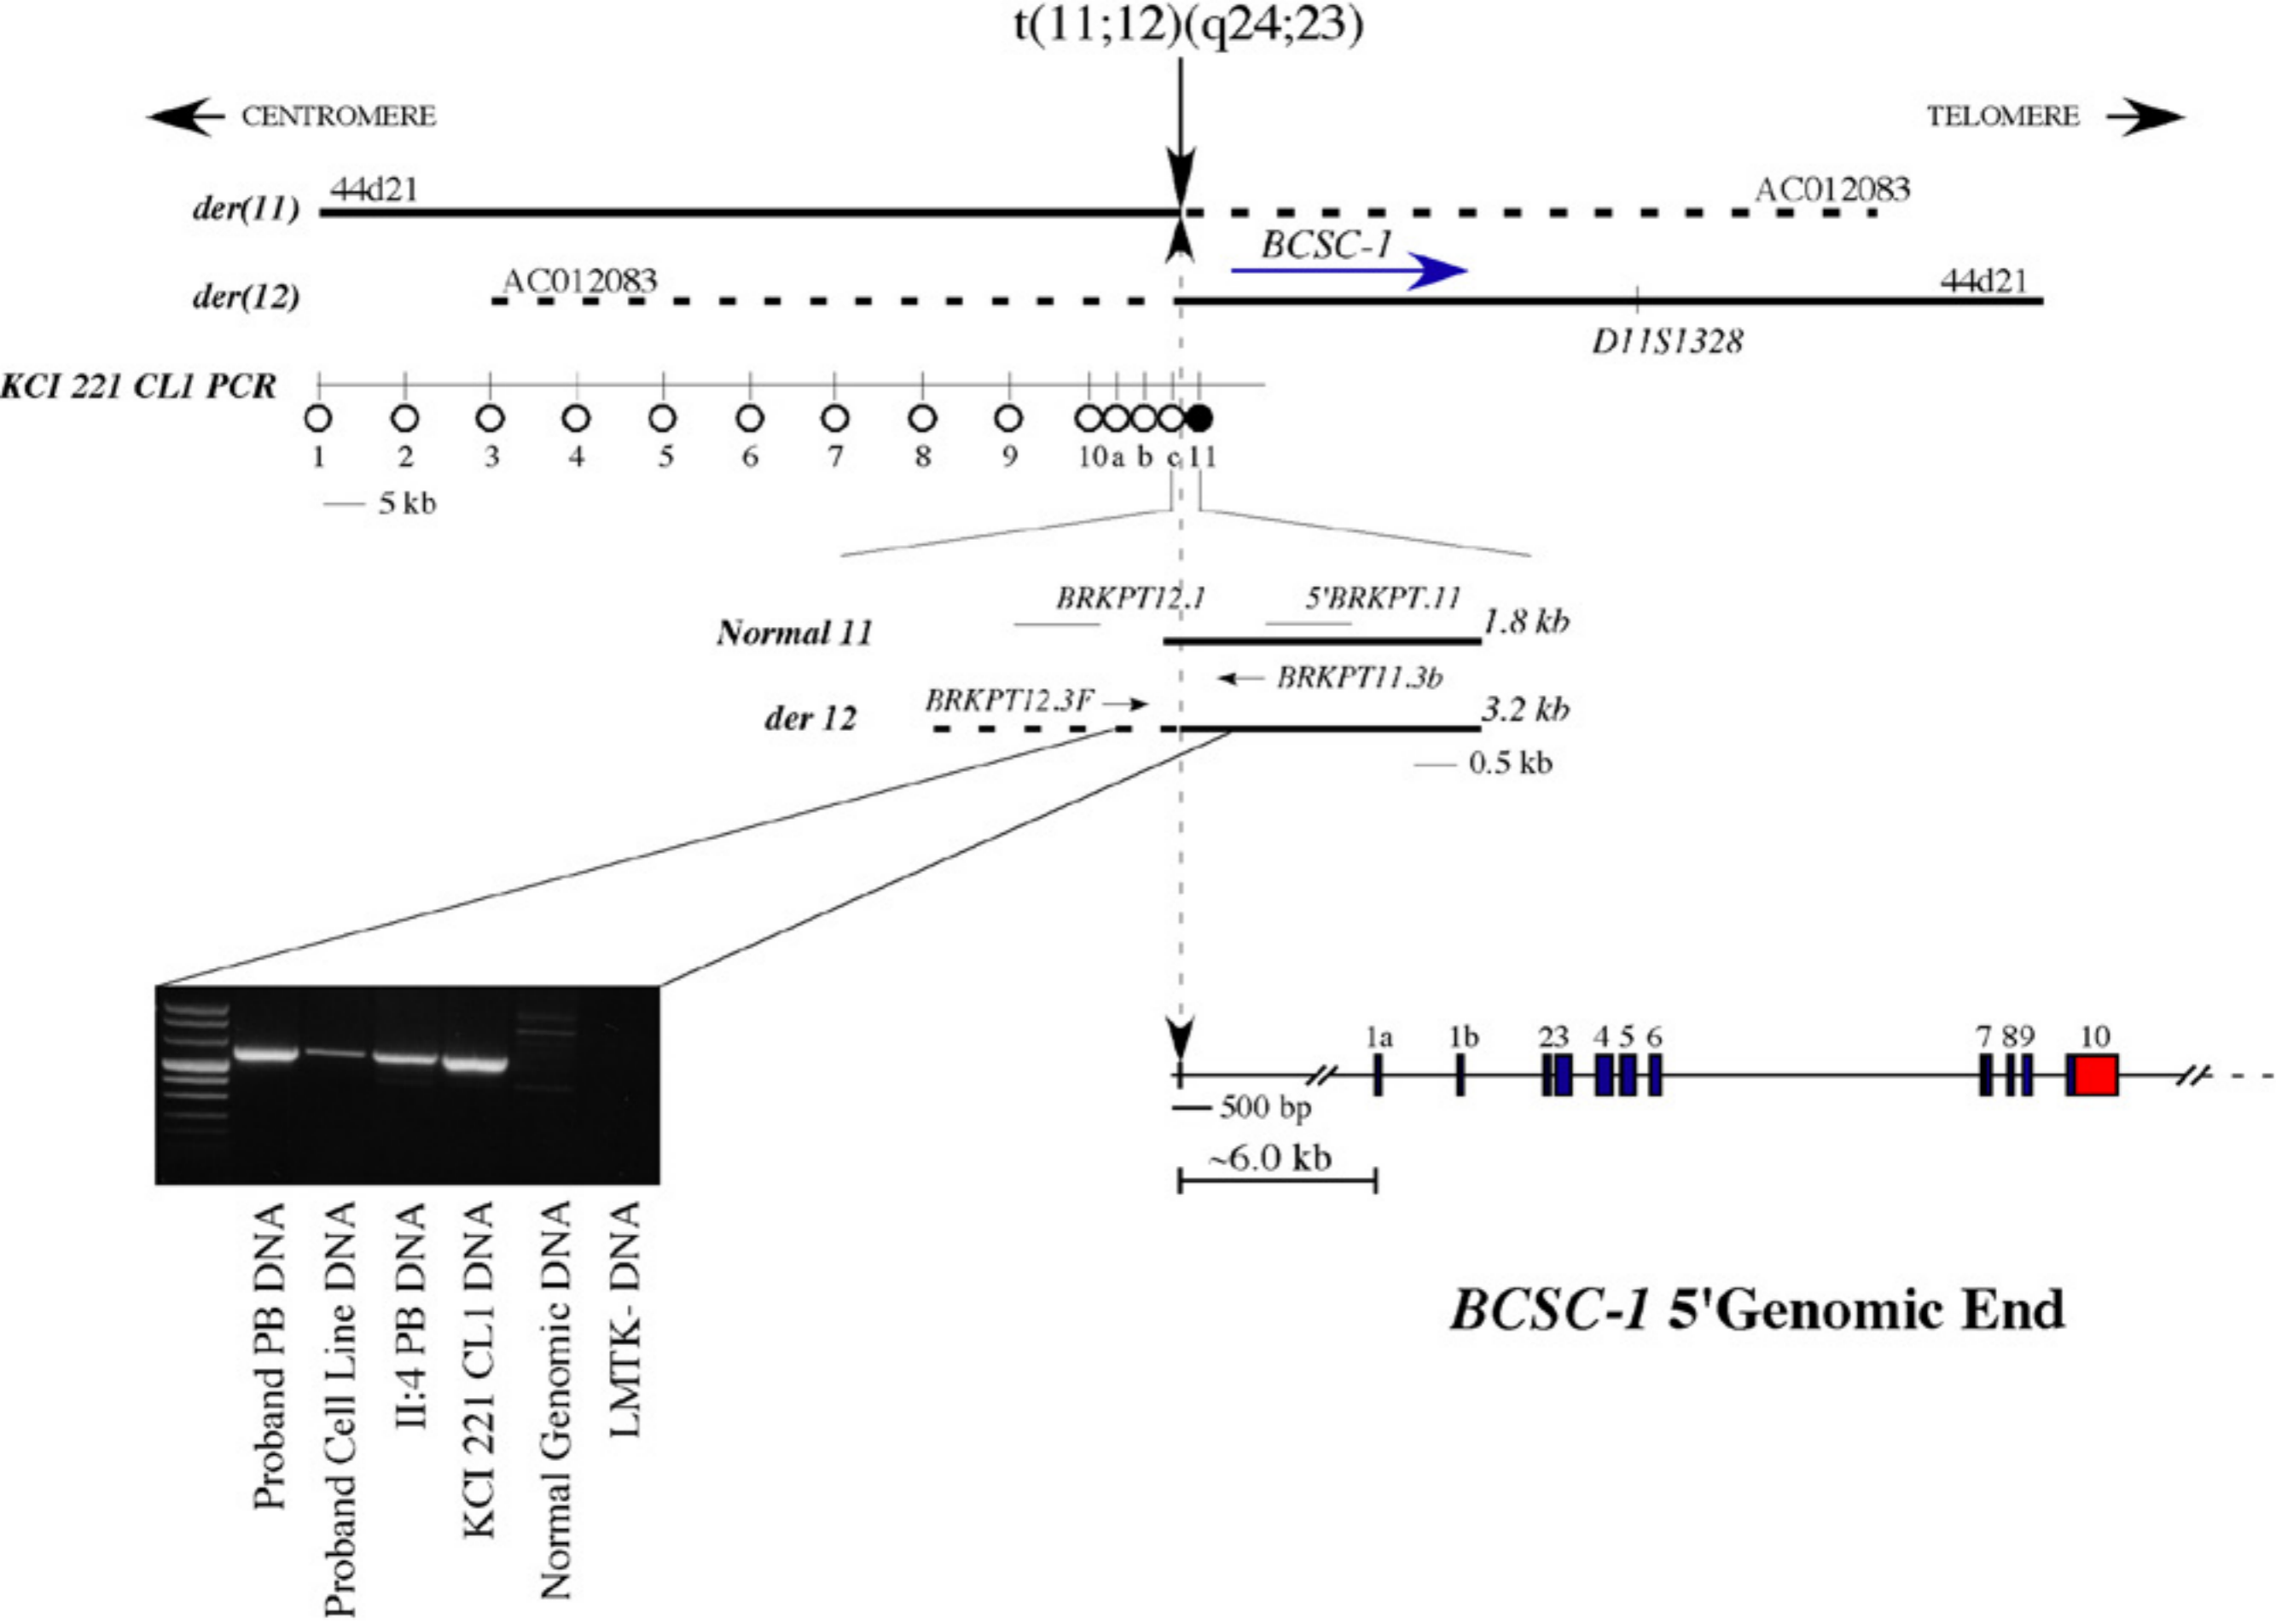

Supplement: pnas_100_20_11517__7.pdf [file pnas_100_20_11517__7.pdf]
